# Supplementary material for: Electrochemical deposition and photoelectrochemistry of CuWO4, a promising photoanode for water oxidation
Source: Royal Society of Chemistry journal article supplement (doi:10.1039/c1jm11259g), 2011-01-01

**Electronic Supplementary Information for:**

**Electrochemical Deposition and Photoelectrochemistry of  
CuWO<sub>4</sub>, a Promising Photoanode for Water Oxidation**

Joseph E. Yourey and Bart M. Bartlett\*  
*Department of Chemistry, University of Michigan  
930 N. University Ave. Ann Arbor MI, 48109-1055*

Table of Contents

|                                                                                                                                 |    |
|---------------------------------------------------------------------------------------------------------------------------------|----|
| Figure S1. X-ray photoelectron spectra for Cu(2p) and W(4f) in an amorphous, as deposited film                                  | S2 |
| Figure S2. Photographs and heating scheme for the crystallization of CuWO <sub>4</sub> electrodes                               | S2 |
| Figure S3. X-ray photoelectron survey scan of crystalline CuWO <sub>4</sub> electrodes                                          | S3 |
| Figure S4. X-ray diffraction pattern of CuWO <sub>4</sub> electrode, as deposited and after annealing at 400 °C.                | S3 |
| Figure S5. Bulk electrolysis experiment of CuWO <sub>4</sub> and WO <sub>3</sub> electrodes at 0.5 V vs Ag/AgCl applied bias    | S4 |
| Figure S6. Bode plot constructed from EIS data                                                                                  | S4 |
| Figure S7. Spectral Response of CuWO <sub>4</sub> and WO <sub>3</sub> electrodes                                                | S5 |
| Figure S8. Electrochemical deposition control experiments for Cu <sup>2+</sup> and W <sub>2</sub> O <sub>11</sub> <sup>2-</sup> | S5 |

**Figure S1** (a) X-Ray photoelectron spectra of amorphous films for Cu(2p) showing peaks indicative of both  $\text{Cu}^+$  (blue) and  $\text{Cu}^{2+}$  (red) and (b) W(4f) indicative of  $\text{W}^{6+}$ .

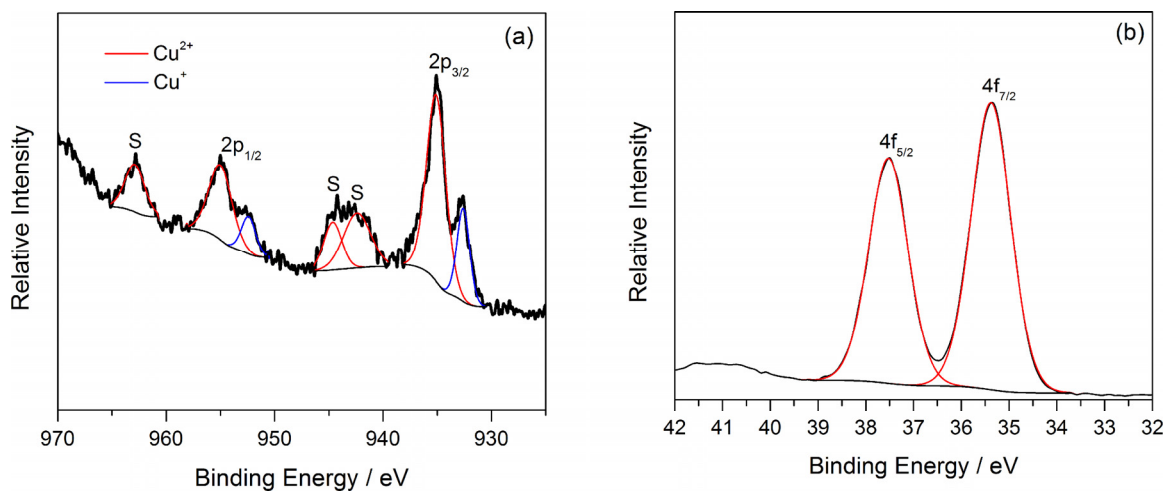

**Figure S2** Heating scheme for the crystallization of  $\text{CuWO}_4$  electrodes. The ramp rate was  $\sim 1.3$   $^{\circ}\text{C}/\text{min}$  and the annealing temperature was kept at  $500$   $^{\circ}\text{C}$  for 2 h.

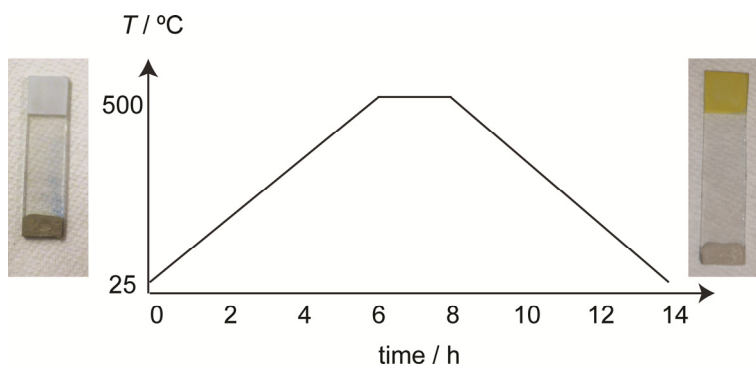

**Figure S3** X-Ray photoelectron survey scan. The Cu(2p), O(1s), and W(4f) binding energies are noted in the figure.

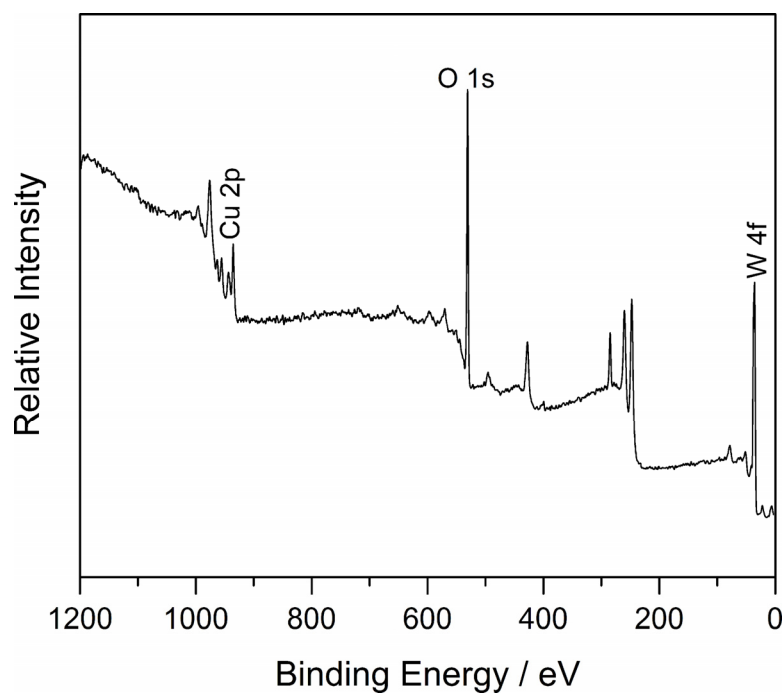

**Figure S4** X-ray diffraction pattern of the as deposited film (blue) and after annealing at 400 °C for 2 hours (black).

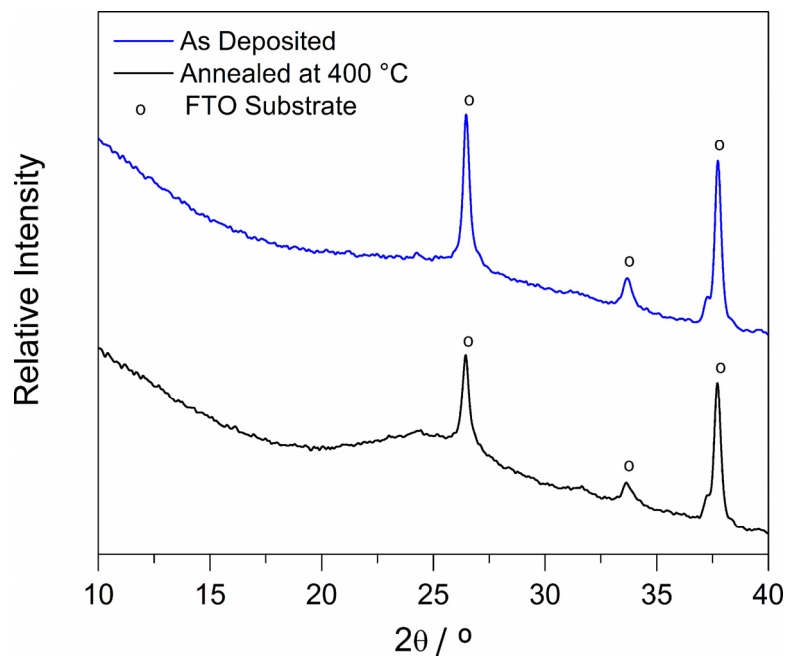

**Figure S5** Bulk electrolysis experiment of  $\text{CuWO}_4$  (black) and  $\text{WO}_3$  (green) at 0.5V vs Ag/AgCl in a 0.1M phosphate buffer (pH 7). **Inset.** Decay of the  $\text{WO}_3$  photoanode over the first hour of illumination.

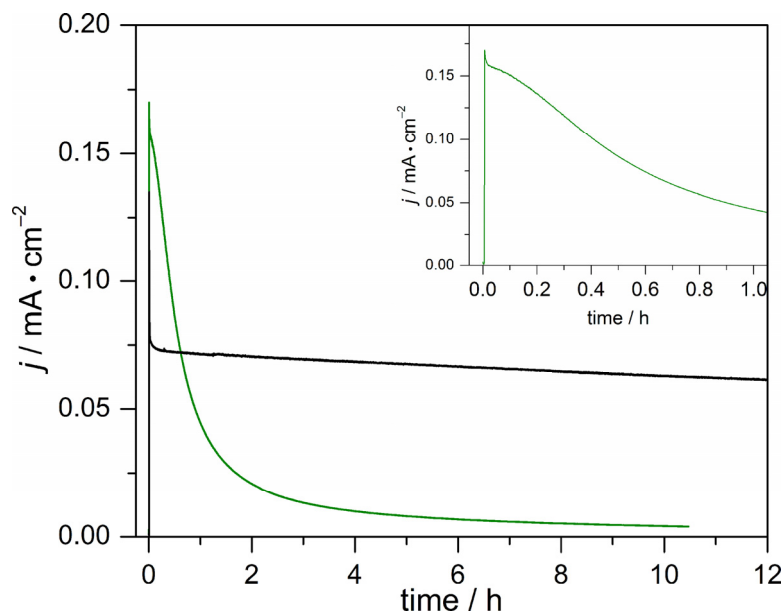

**Figure S6** Bode plot for a  $\text{CuWO}_4$  film constructed from the impedance data taken in 0.1 M potassium phosphate buffer (pH 7).

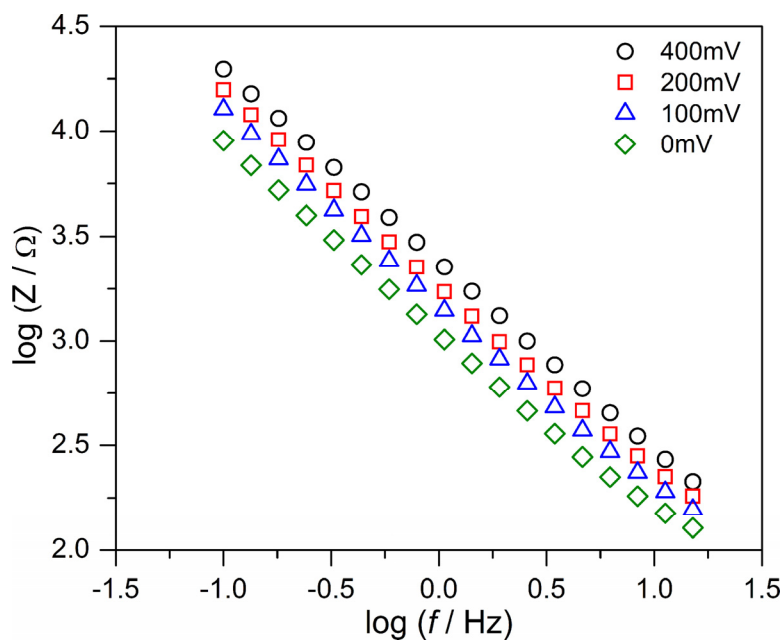

**Figure S7** Spectral response of  $\text{CuWO}_4$  and  $\text{WO}_3$  in 0.1 M  $\text{Na}_2\text{SO}_4$  with 10% MeOH and the quantitative absorption spectrum of a 2  $\mu\text{m}$  thick  $\text{CuWO}_4$  film.

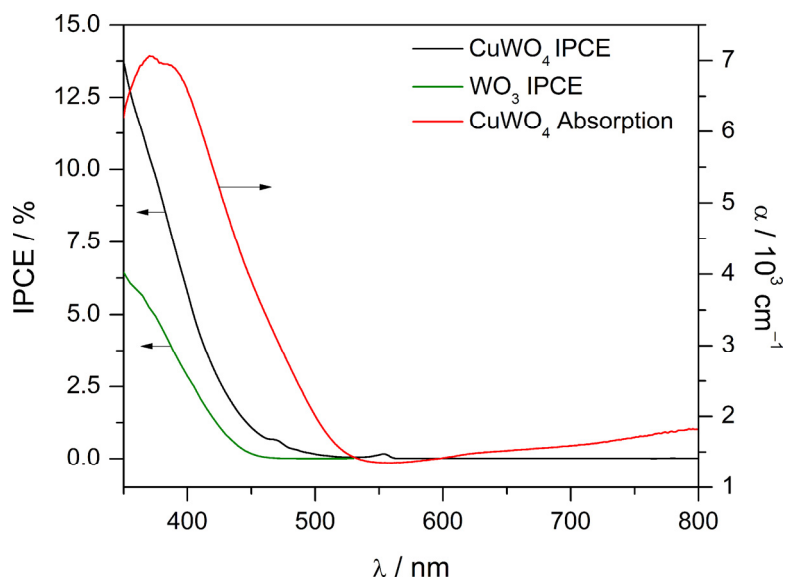

**Figure S8** Electrochemical deposition control experiments in the same potential window (+0.3 to -0.5 V vs Ag/AgCl) for (a) 0.25M  $\text{Cu}^{2+}$  in a pH 1.1 solution of 70:30  $\text{H}_2\text{O}$ :2-propanol and (b) 0.25M  $\text{W}_2\text{O}_{11}^{2-}$  in a pH 1.1 solution of 70:30  $\text{H}_2\text{O}$ :2-propanol.

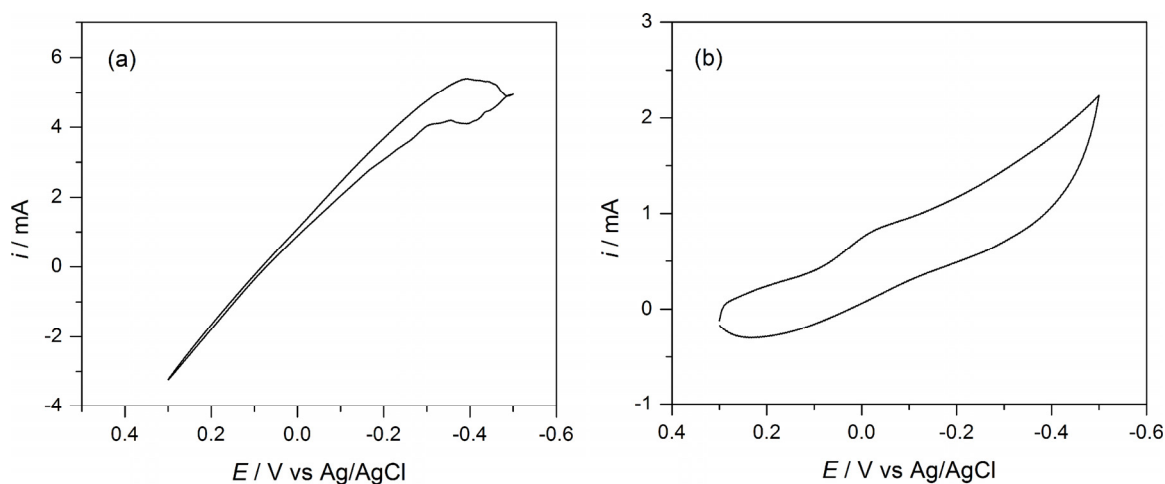

Supplement: c1jm11259g.pdf [file c1jm11259g.pdf]
